# Supplementary material for: Development of Robust and Standardized Cantilever Sensors Based on Biotin/Neutravidin Coupling for Antibody Detection
Source: Sensors (Basel). 2013 Apr 19;13(4):5273–85. doi: 10.3390/s130405273 (PMC3673136; doi:10.3390/s130405273)

## Development of Robust and Standardized Cantilever Sensors Based on Biotin/Neutravidin Coupling for Antibody Detection. *Sensors* 2013, 13, 5273-5285

Jiayun Zhang <sup>1,\*</sup>, Hans Peter Lang <sup>1</sup>, Felice Battiston <sup>2</sup>, Natalija Backmann <sup>1</sup>, Francois Huber <sup>1</sup> and Christoph Gerber <sup>1</sup>

<sup>1</sup> Swiss Nano Institute, University of Basel, Klingelbergstrasse 82, 4056 Basel, Switzerland; E-Mails: hans-peter.lang@unibas.ch (H.P.L.); natalija.backmann@unibas.ch (N.B.); francois.huber@unibas.ch (F.H.); christoph.gerber@unibas.ch (C.G.)

<sup>2</sup> Concentris GmbH, Basel, Davidsbodenstrasse 63, 4056 Basel, Switzerland; E-Mail: battiston@concentris.ch

\* Author to whom correspondence should be addressed; E-Mail: jiayun.zhang@unibas.ch; Tel.: +41-61-267-3769; Fax: +41-61-267-3784.

**Figure A.** Comparison of responses of IgG with multilayer which was formed using different functionalization methods. Orange bars: subsequent functionalization in the cantilever device by injecting 1.5  $\mu$ M NeutrAvidin solution into the measurement cell; violet bars: subsequent functionalization in 100  $\mu$ L of container by immersing the whole array in the same concentration of NeutrAvidin solution.

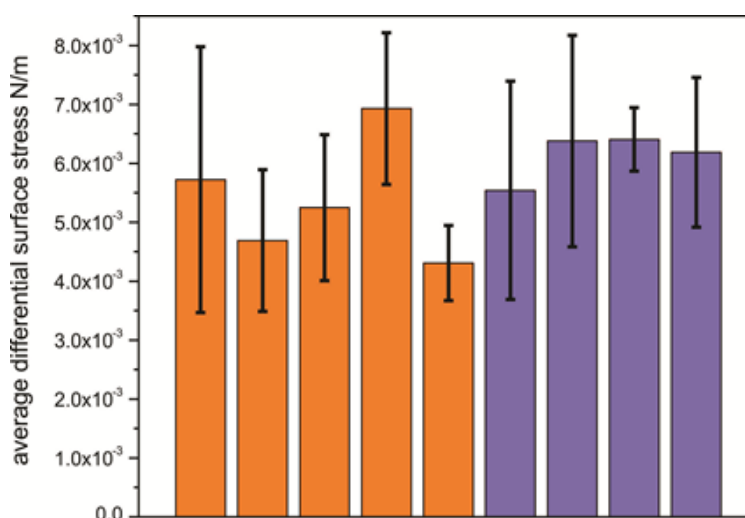

Supplement: Supplementary file 1 [file sensors-13-05273-s001.pdf]
